# Supplementary material for: A Meshless WCSPH Boundary Treatment for Open‐Channel Flow over Small‐Scale Rough Bed
Source: Hindawi journal article supplement (doi:10.1155/2019/1573049), 2019-01-01
Supplement: f1 [file 1573049.f1.pdf]

### The training data of multi-objective genetic algorithm

Note that in the following tables,  $U$  denotes average currently in inlet and outlet zone,  $u^*$  denotes friction velocity,  $Re$  denotes the Reynolds number,  $F_r$  denotes the Froude number,  $Re^*$  denotes the friction Reynolds number and  $u_g^*$  denotes the dimensionless ghost particle velocity in wall function model.

Table 1 Training data for the case of hydraulic smooth flow.

| Case |                   | $U$<br>(m/s) | $u^*$<br>(m/s) | $Re$   | $F_r$    | $Re^*$   | $u_g^*$<br>(m/s) |
|------|-------------------|--------------|----------------|--------|----------|----------|------------------|
| 1    | H50s001ks0.05(2)  | 0.446        | 0.02215        | 22300  | 0.636818 | 1.107362 | 0.2              |
| 2    | H50s001ks0.05(3)  | 0.446        | 0.02215        | 22300  | 0.636818 | 1.107362 | 0.23             |
| 3    | H50s001ks0.05(4)  | 0.446        | 0.02215        | 22300  | 0.636818 | 1.107362 | 0.24             |
| 4    | H50s002ks0.05(2)  | 0.73         | 0.03132        | 36500  | 1.042325 | 1.566046 | 0.35             |
| 5    | H50s002ks0.05(3)  | 0.73         | 0.03132        | 36500  | 1.042325 | 1.566046 | 0.38             |
| 6    | H50s002ks0.05(4)  | 0.73         | 0.03132        | 36500  | 1.042325 | 1.566046 | 0.45             |
| 7    | H50s004ks0.05(2)  | 1.2          | 0.04429        | 60000  | 1.713412 | 2.214723 | 0.47             |
| 8    | H50s004ks0.05(3)  | 1.2          | 0.04429        | 60000  | 1.713412 | 2.214723 | 0.5              |
| 9    | H50s004ks0.05(4)  | 1.2          | 0.04429        | 60000  | 1.713412 | 2.214723 | 0.55             |
| 10   | H80s001ks0.05(2)  | 0.631        | 0.02801        | 50480  | 0.712279 | 1.400714 | 0.31             |
| 11   | H80s001ks0.05(3)  | 0.631        | 0.02801        | 50480  | 0.712279 | 1.400714 | 0.33             |
| 12   | H80s001ks0.05(4)  | 0.631        | 0.02801        | 50480  | 0.712279 | 1.400714 | 0.35             |
| 13   | H80s002ks0.05(2)  | 1.05         | 0.03962        | 84000  | 1.18525  | 1.980909 | 0.51             |
| 14   | H80s002ks0.05(3)  | 1.05         | 0.03962        | 84000  | 1.18525  | 1.980909 | 0.55             |
| 15   | H80s002ks0.05(4)  | 1.05         | 0.03962        | 84000  | 1.18525  | 1.980909 | 0.6              |
| 16   | H80s004ks0.05(2)  | 1.58         | 0.05603        | 126400 | 1.783518 | 2.801428 | 0.7              |
| 17   | H80s004ks0.05(3)  | 1.58         | 0.05603        | 126400 | 1.783518 | 2.801428 | 0.75             |
| 18   | H80s004ks0.05(4)  | 1.58         | 0.05603        | 126400 | 1.783518 | 2.801428 | 0.8              |
| 19   | H100s001ks0.05(2) | 0.74         | 0.03132        | 74000  | 0.747132 | 1.566046 | 0.34             |
| 20   | H100s001ks0.05(3) | 0.74         | 0.03132        | 74000  | 0.747132 | 1.566046 | 0.36             |
| 21   | H100s001ks0.05(4) | 0.74         | 0.03132        | 74000  | 0.747132 | 1.566046 | 0.4              |
| 22   | H100s002ks0.05(2) | 1.18         | 0.04429        | 118000 | 1.191372 | 2.214723 | 0.52             |
| 23   | H100s002ks0.05(3) | 1.18         | 0.04429        | 118000 | 1.191372 | 2.214723 | 0.55             |
| 24   | H100s002ks0.05(4) | 1.18         | 0.04429        | 118000 | 1.191372 | 2.214723 | 0.6              |
| 25   | H100s004ks0.05(2) | 1.86         | 0.06264        | 186000 | 1.877926 | 3.132092 | 0.95             |
| 26   | H100s004ks0.05(3) | 1.86         | 0.06264        | 186000 | 1.877926 | 3.132092 | 1                |
| 27   | H100s004ks0.05(4) | 1.86         | 0.06264        | 186000 | 1.877926 | 3.132092 | 1.1              |
| 28   | H50s001ks0.1(2)   | 0.493        | 0.022147       | 24650  | 0.703927 | 2.214723 | 0.25             |
| 29   | H50s001ks0.1(3)   | 0.493        | 0.022147       | 24650  | 0.703927 | 2.214723 | 0.27             |
| 30   | H50s001ks0.1(4)   | 0.493        | 0.022147       | 24650  | 0.703927 | 2.214723 | 0.3              |
| 31   | H50s001ks0.2(2)   | 0.54         | 0.022147       | 27000  | 0.771035 | 4.429447 | 0.29             |
| 32   | H50s001ks0.2(3)   | 0.54         | 0.022147       | 27000  | 0.771035 | 4.429447 | 0.31             |
| 33   | H50s001ks0.2(4)   | 0.54         | 0.022147       | 27000  | 0.771035 | 4.429447 | 0.34             |
| 34   | H50s001ks0.15(2)  | 0.515        | 0.022147       | 25750  | 0.735339 | 3.322085 | 0.27             |

|    |                  |       |          |       |          |          |      |
|----|------------------|-------|----------|-------|----------|----------|------|
| 35 | H50s001ks0.15(3) | 0.515 | 0.022147 | 25750 | 0.735339 | 3.322085 | 0.29 |
| 36 | H50s001ks0.15(4) | 0.515 | 0.022147 | 25750 | 0.735339 | 3.322085 | 0.32 |
| 37 | H50s002ks0.1(2)  | 0.785 | 0.031321 | 39250 | 1.120857 | 3.132092 | 0.39 |
| 38 | H50s002ks0.1(3)  | 0.785 | 0.031321 | 39250 | 1.120857 | 3.132092 | 0.41 |
| 39 | H50s002ks0.1(4)  | 0.785 | 0.031321 | 39250 | 1.120857 | 3.132092 | 0.44 |
| 40 | H50s002ks0.15(2) | 0.816 | 0.031321 | 40800 | 1.16512  | 4.698138 | 0.42 |
| 41 | H50s002ks0.15(3) | 0.816 | 0.031321 | 40800 | 1.16512  | 4.698138 | 0.44 |
| 42 | H50s002ks0.15(4) | 0.816 | 0.031321 | 40800 | 1.16512  | 4.698138 | 0.46 |
| 43 | H50s003ks0.1(2)  | 0.988 | 0.03836  | 49400 | 1.410709 | 3.836014 | 0.49 |
| 44 | H50s003ks0.1(3)  | 0.988 | 0.03836  | 49400 | 1.410709 | 3.836014 | 0.51 |
| 45 | H50s003ks0.1(4)  | 0.988 | 0.03836  | 49400 | 1.410709 | 3.836014 | 0.55 |
| 46 | H50s004ks0.1(2)  | 1.188 | 0.044294 | 59400 | 1.696278 | 4.429447 | 0.59 |
| 47 | H50s004ks0.1(3)  | 1.188 | 0.044294 | 59400 | 1.696278 | 4.429447 | 0.61 |
| 48 | H50s004ks0.1(4)  | 1.188 | 0.044294 | 59400 | 1.696278 | 4.429447 | 0.65 |
| 49 | H50s005ks0.1(2)  | 1.233 | 0.049523 | 61650 | 1.760531 | 4.952272 | 0.67 |
| 50 | H50s005ks0.1(3)  | 1.233 | 0.049523 | 61650 | 1.760531 | 4.952272 | 0.7  |
| 51 | H50s005ks0.1(4)  | 1.233 | 0.049523 | 61650 | 1.760531 | 4.952272 | 0.75 |

Table 2 Training data for the case of hydraulic transition flow experimental group.

| Case | $U$<br>(m/s)  | $u^*$<br>(m/s) | $Re$    | $Fr$  | $Re^*$   | $u_g^*$<br>(m/s) |      |
|------|---------------|----------------|---------|-------|----------|------------------|------|
| 1    | H50s001ks1(2) | 0.55           | 0.02215 | 27500 | 0.785314 | 22.14723         | 0.25 |
| 2    | H50s001ks1(3) | 0.55           | 0.02215 | 27500 | 0.785314 | 22.14723         | 0.27 |
| 3    | H50s001ks1(4) | 0.55           | 0.02215 | 27500 | 0.785314 | 22.14723         | 0.3  |
| 4    | H50s001ks2(2) | 0.545          | 0.02215 | 27250 | 0.778175 | 44.29447         | 0.24 |
| 5    | H50s001ks2(3) | 0.545          | 0.02215 | 27250 | 0.778175 | 44.29447         | 0.26 |
| 6    | H50s001ks2(4) | 0.545          | 0.02215 | 27250 | 0.778175 | 44.29447         | 0.28 |
| 7    | H50s002ks1(2) | 0.805          | 0.03132 | 40250 | 1.149414 | 31.32092         | 0.39 |
| 8    | H50s002ks1(3) | 0.805          | 0.03132 | 40250 | 1.149414 | 31.32092         | 0.43 |
| 9    | H50s002ks1(4) | 0.805          | 0.03132 | 40250 | 1.149414 | 31.32092         | 0.48 |
| 10   | H50s002ks2(2) | 0.795          | 0.03132 | 39750 | 1.135135 | 62.64184         | 0.36 |
| 11   | H50s002ks2(3) | 0.795          | 0.03132 | 39750 | 1.135135 | 62.64184         | 0.4  |
| 12   | H50s002ks2(4) | 0.795          | 0.03132 | 39750 | 1.135135 | 62.64184         | 0.45 |
| 13   | H50s002ks2(2) | 1.17           | 0.04429 | 58500 | 1.670576 | 44.29447         | 0.48 |
| 14   | H50s002ks2(3) | 1.17           | 0.04429 | 58500 | 1.670576 | 44.29447         | 0.52 |
| 15   | H50s002ks2(4) | 1.17           | 0.04429 | 58500 | 1.670576 | 44.29447         | 0.57 |
| 16   | H80s001ks1(2) | 0.756          | 0.02801 | 60480 | 0.85338  | 28.01428         | 0.35 |
| 17   | H80s001ks1(3) | 0.756          | 0.02801 | 60480 | 0.85338  | 28.01428         | 0.38 |
| 18   | H80s001ks1(4) | 0.756          | 0.02801 | 60480 | 0.85338  | 28.01428         | 0.42 |
| 19   | H80s001ks2(2) | 0.746          | 0.02801 | 59680 | 0.842092 | 56.02856         | 0.34 |
| 20   | H80s001ks2(3) | 0.746          | 0.02801 | 59680 | 0.842092 | 56.02856         | 0.37 |
| 21   | H80s001ks2(4) | 0.746          | 0.02801 | 59680 | 0.842092 | 56.02856         | 0.41 |
| 22   | H80s002ks1(2) | 1.07           | 0.03962 | 85600 | 1.207826 | 39.61818         | 0.51 |

|    |                |       |         |        |          |          |      |
|----|----------------|-------|---------|--------|----------|----------|------|
| 23 | H80s002ks1(3)  | 1.07  | 0.03962 | 85600  | 1.207826 | 39.61818 | 0.54 |
| 24 | H80s002ks1(4)  | 1.07  | 0.03962 | 85600  | 1.207826 | 39.61818 | 0.58 |
| 25 | H80s004ks1(2)  | 1.586 | 0.05603 | 126880 | 1.790291 | 56.02856 | 0.82 |
| 26 | H80s004ks1(3)  | 1.586 | 0.05603 | 126880 | 1.790291 | 56.02856 | 0.85 |
| 27 | H80s004ks1(4)  | 1.586 | 0.05603 | 126880 | 1.790291 | 56.02856 | 0.9  |
| 28 | H100s001ks1(2) | 0.85  | 0.03132 | 85000  | 0.858192 | 31.32092 | 0.43 |
| 29 | H100s001ks1(3) | 0.85  | 0.03132 | 85000  | 0.858192 | 31.32092 | 0.46 |
| 30 | H100s001ks1(4) | 0.85  | 0.03132 | 85000  | 0.858192 | 31.32092 | 0.5  |
| 31 | H100s001ks2(2) | 0.84  | 0.03132 | 84000  | 0.848096 | 62.64184 | 0.4  |
| 32 | H100s001ks2(3) | 0.84  | 0.03132 | 84000  | 0.848096 | 62.64184 | 0.43 |
| 33 | H100s001ks2(4) | 0.84  | 0.03132 | 84000  | 0.848096 | 62.64184 | 0.47 |
| 34 | H100s002ks1(2) | 1.25  | 0.04429 | 125000 | 1.262047 | 44.29447 | 0.54 |
| 35 | H100s002ks1(3) | 1.25  | 0.04429 | 125000 | 1.262047 | 44.29447 | 0.6  |
| 36 | H100s002ks1(4) | 1.25  | 0.04429 | 125000 | 1.262047 | 44.29447 | 0.65 |
| 37 | H100s004ks1(2) | 1.85  | 0.06264 | 185000 | 1.867829 | 62.64184 | 0.82 |
| 38 | H100s004ks1(3) | 1.85  | 0.06264 | 185000 | 1.867829 | 62.64184 | 0.87 |
| 39 | H100s004ks1(4) | 1.85  | 0.06264 | 185000 | 1.867829 | 62.64184 | 0.95 |

Table 3 Training data for the case of hydraulic rough flow experimental group.

| Case | $U$<br>(m/s)   | $u^*$<br>(m/s) | $Re$    | $Fr$  | $Re^*$   | $u_g^*$<br>(m/s) |        |
|------|----------------|----------------|---------|-------|----------|------------------|--------|
| 1    | H50s001ks10(2) | 0.221          | 0.02215 | 11050 | 0.315553 | 221.4723         | 0.01   |
| 2    | H50s001ks10(3) | 0.221          | 0.02215 | 11050 | 0.315553 | 221.4723         | 0.015  |
| 3    | H50s001ks10(4) | 0.221          | 0.02215 | 11050 | 0.315553 | 221.4723         | 0.03   |
| 4    | H50s002ks10(2) | 0.312          | 0.03132 | 15600 | 0.445487 | 313.2092         | -0.025 |
| 5    | H50s002ks10(3) | 0.312          | 0.03132 | 15600 | 0.445487 | 313.2092         | -0.02  |
| 6    | H50s002ks10(4) | 0.312          | 0.03132 | 15600 | 0.445487 | 313.2092         | -0.015 |
| 7    | H50s004ks2(2)  | 0.661          | 0.04429 | 33050 | 0.943804 | 88.58894         | 0.16   |
| 8    | H50s004ks2(3)  | 0.661          | 0.04429 | 33050 | 0.943804 | 88.58894         | 0.18   |
| 9    | H50s004ks2(4)  | 0.661          | 0.04429 | 33050 | 0.943804 | 88.58894         | 0.21   |
| 10   | H50s004ks10(2) | 0.441          | 0.04429 | 22050 | 0.629679 | 442.9447         | -0.04  |
| 11   | H50s004ks10(3) | 0.441          | 0.04429 | 22050 | 0.629679 | 442.9447         | -0.03  |
| 12   | H50s004ks10(4) | 0.441          | 0.04429 | 22050 | 0.629679 | 442.9447         | -0.02  |
| 13   | H80s001ks10(2) | 0.311          | 0.02801 | 24880 | 0.35106  | 280.1428         | 0.011  |
| 14   | H80s001ks10(3) | 0.311          | 0.02801 | 24880 | 0.35106  | 280.1428         | 0.015  |
| 15   | H80s001ks10(4) | 0.311          | 0.02801 | 24880 | 0.35106  | 280.1428         | 0.02   |
| 16   | H80s002ks2(2)  | 0.6            | 0.03962 | 48000 | 0.677285 | 79.23636         | 0.07   |
| 17   | H80s002ks2(3)  | 0.6            | 0.03962 | 48000 | 0.677285 | 79.23636         | 0.11   |
| 18   | H80s002ks2(4)  | 0.6            | 0.03962 | 48000 | 0.677285 | 79.23636         | 0.2    |
| 19   | H80s002ks10(2) | 0.44           | 0.03962 | 35200 | 0.496676 | 396.1818         | -0.021 |
| 20   | H80s002ks10(3) | 0.44           | 0.03962 | 35200 | 0.496676 | 396.1818         | -0.02  |
| 21   | H80s002ks10(4) | 0.44           | 0.03962 | 35200 | 0.496676 | 396.1818         | -0.018 |
| 22   | H80s004ks2(2)  | 0.9            | 0.05603 | 72000 | 1.015928 | 112.0571         | 0.22   |

|    |                 |       |          |        |          |          |        |
|----|-----------------|-------|----------|--------|----------|----------|--------|
| 23 | H80s004ks2(3)   | 0.9   | 0.05603  | 72000  | 1.015928 | 112.0571 | 0.25   |
| 24 | H80s004ks2(4)   | 0.9   | 0.05603  | 72000  | 1.015928 | 112.0571 | 0.28   |
| 25 | H80s004ks10(2)  | 0.623 | 0.05603  | 49840  | 0.703248 | 560.2856 | -0.1   |
| 26 | H80s004ks10(3)  | 0.623 | 0.05603  | 49840  | 0.703248 | 560.2856 | -0.08  |
| 27 | H80s004ks10(4)  | 0.623 | 0.05603  | 49840  | 0.703248 | 560.2856 | -0.06  |
| 28 | H100s001ks10(2) | 0.365 | 0.03132  | 36500  | 0.368518 | 313.2092 | 0.013  |
| 29 | H100s001ks10(3) | 0.365 | 0.03132  | 36500  | 0.368518 | 313.2092 | 0.03   |
| 30 | H100s001ks10(4) | 0.365 | 0.03132  | 36500  | 0.368518 | 313.2092 | 0.05   |
| 31 | H100s002ks2(2)  | 0.688 | 0.04429  | 68800  | 0.694631 | 88.58894 | 0.11   |
| 32 | H100s002ks2(3)  | 0.688 | 0.04429  | 68800  | 0.694631 | 88.58894 | 0.13   |
| 33 | H100s002ks2(4)  | 0.688 | 0.04429  | 68800  | 0.694631 | 88.58894 | 0.18   |
| 34 | H100s002ks10(2) | 0.517 | 0.04429  | 51700  | 0.521983 | 442.9447 | 0.017  |
| 35 | H100s002ks10(3) | 0.517 | 0.04429  | 51700  | 0.521983 | 442.9447 | 0.02   |
| 36 | H100s002ks10(4) | 0.517 | 0.04429  | 51700  | 0.521983 | 442.9447 | 0.03   |
| 37 | H100s004ks2(2)  | 1.023 | 0.06264  | 102300 | 1.032859 | 125.2837 | 0.27   |
| 38 | H100s004ks2(3)  | 1.023 | 0.06264  | 102300 | 1.032859 | 125.2837 | 0.31   |
| 39 | H100s004ks2(4)  | 1.023 | 0.06264  | 102300 | 1.032859 | 125.2837 | 0.34   |
| 40 | H100s004ks10(2) | 0.731 | 0.06264  | 73100  | 0.738045 | 626.4184 | -0.043 |
| 41 | H100s004ks10(3) | 0.731 | 0.06264  | 73100  | 0.738045 | 626.4184 | -0.022 |
| 42 | H100s004ks10(4) | 0.731 | 0.06264  | 73100  | 0.738045 | 626.4184 | -0.001 |
| 43 | H50s001ks4(2)   | 0.27  | 0.022147 | 13500  | 0.385518 | 88.58894 | 0.055  |
| 44 | H50s001ks4(3)   | 0.27  | 0.022147 | 13500  | 0.385518 | 88.58894 | 0.06   |
| 45 | H50s001ks4(4)   | 0.27  | 0.022147 | 13500  | 0.385518 | 88.58894 | 0.07   |
| 46 | H50s001ks5(2)   | 0.257 | 0.022147 | 12850  | 0.366956 | 110.7362 | 0.03   |
| 47 | H50s001ks5(3)   | 0.257 | 0.022147 | 12850  | 0.366956 | 110.7362 | 0.04   |
| 48 | H50s001ks5(4)   | 0.257 | 0.022147 | 12850  | 0.366956 | 110.7362 | 0.045  |
| 49 | H50s002ks3(2)   | 0.402 | 0.031321 | 20100  | 0.573993 | 93.96276 | 0.085  |
| 50 | H50s002ks3(3)   | 0.412 | 0.031321 | 20600  | 0.588271 | 93.96276 | 0.09   |
| 51 | H50s002ks3(4)   | 0.422 | 0.031321 | 21100  | 0.60255  | 93.96276 | 0.1    |
| 52 | H50s002ks4(2)   | 0.39  | 0.031321 | 19500  | 0.556859 | 125.2837 | 0.065  |
| 53 | H50s002ks4(3)   | 0.39  | 0.031321 | 19500  | 0.556859 | 125.2837 | 0.07   |
| 54 | H50s002ks4(4)   | 0.39  | 0.031321 | 19500  | 0.556859 | 125.2837 | 0.08   |
| 55 | H50s003ks2(2)   | 0.579 | 0.03836  | 28950  | 0.826721 | 76.72027 | 0.12   |
| 56 | H50s003ks2(3)   | 0.579 | 0.03836  | 28950  | 0.826721 | 76.72027 | 0.15   |
| 57 | H50s003ks2(4)   | 0.579 | 0.03836  | 28950  | 0.826721 | 76.72027 | 0.17   |
| 58 | H50s003ks3(2)   | 0.492 | 0.03836  | 24600  | 0.702499 | 115.0804 | 0.1    |
| 59 | H50s003ks3(3)   | 0.492 | 0.03836  | 24600  | 0.702499 | 115.0804 | 0.12   |
| 60 | H50s003ks3(4)   | 0.492 | 0.03836  | 24600  | 0.702499 | 115.0804 | 0.15   |
| 61 | H50s004ks3(2)   | 0.588 | 0.044294 | 29400  | 0.839572 | 132.8834 | 0.13   |
| 62 | H50s004ks3(3)   | 0.588 | 0.044294 | 29400  | 0.839572 | 132.8834 | 0.15   |
| 63 | H50s004ks3(4)   | 0.588 | 0.044294 | 29400  | 0.839572 | 132.8834 | 0.18   |
| 64 | H50s005ks2(2)   | 0.703 | 0.049523 | 35150  | 1.003774 | 99.04544 | 0.2    |
| 65 | H50s005ks2(3)   | 0.703 | 0.049523 | 35150  | 1.003774 | 99.04544 | 0.22   |

|    |               |       |          |       |          |          |      |
|----|---------------|-------|----------|-------|----------|----------|------|
| 66 | H50s005ks2(4) | 0.703 | 0.049523 | 35150 | 1.003774 | 99.04544 | 0.28 |
| 67 | H50s005ks3(2) | 0.635 | 0.049523 | 31750 | 0.90668  | 148.5682 | 0.16 |
| 68 | H50s005ks3(3) | 0.635 | 0.049523 | 31750 | 0.90668  | 148.5682 | 0.18 |
| 69 | H50s005ks3(4) | 0.635 | 0.049523 | 31750 | 0.90668  | 148.5682 | 0.22 |
